# Supplementary material
Source: HighWire-hosted journal article supplement (https://wjps.bmj.com/content/5/2/e000350)
Supplement: inline-supplementary-material-1 [file inline-supplementary-material-1.pdf]

**Supplemental table 1.** The Japan Coma Scale scoring.

| Code    |                                                          | Consciousness level (For adult) |                                                                                               | (For child)                                                                                   |
|---------|----------------------------------------------------------|---------------------------------|-----------------------------------------------------------------------------------------------|-----------------------------------------------------------------------------------------------|
|         | 0                                                        | Alert                           |                                                                                               | Alert                                                                                         |
| 1-digit | Awake without stimulation                                | 1                               | Almost fully conscious but not normal                                                         | Laughs when amused, but not fully and aloud.                                                  |
|         |                                                          | 2                               | Unable to recognize time, place, or person                                                    | Does not laugh when amused but able to make eye contact                                       |
|         |                                                          | 3                               | Unable to recall name or date of birth                                                        | Does not make eye contact with the mother.                                                    |
| 2-digit | Awake upon stimulation but asleep when stimulation stops | 10                              | Arousable by being spoken to                                                                  | Tries to drink something if showed it or wanting and sucking a nipple if showed it            |
|         |                                                          | 20                              | Arousable by loud voice                                                                       | Opens and turns eyes to the person who called out.                                            |
|         |                                                          | 30                              | Arousable only by repeated mechanical stimuli                                                 | Slightly opens eyes after repeated calls.                                                     |
| 3-digit | Does not wake upon any stimulation                       | 100                             | Unarousable but responds to avoid the stimuli                                                 | Unarousable but responds to avoid the stimuli                                                 |
|         |                                                          | 200                             | Unarousable but responds with slight movements, including decerebrate or decorticate postures | Unarousable but responds with slight movements, including decerebrate or decorticate postures |
|         |                                                          | 300                             | Does not respond at all                                                                       | Does not respond at all                                                                       |
